# Supplementary figures and images for: Investigating the detection limit of subsurface holes under graphite with atomic force acoustic microscopy
Source: Royal Society of Chemistry journal article supplement (doi:10.1039/c9nr03730f), 2019-01-01

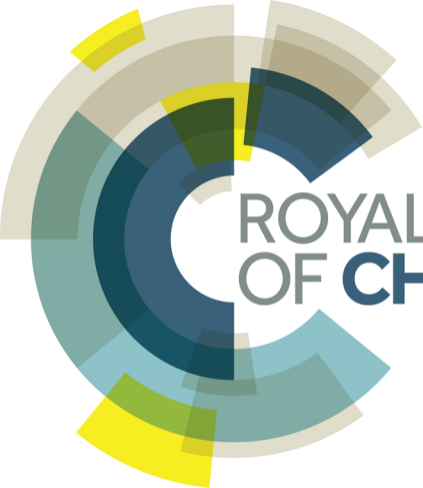

ROYAL SOCIETY  
OF **CHEMISTRY**

Supplement: c9nr03730f2.zip [file c9nr03730f2.zip]
